# Supplementary material
Source: PubMed Central journal article supplement (PMC11156184)
Supplement: NEJMe2400189_disclosures.pdf [file NEJMe2400189_disclosures.pdf]

Discloser Identifier: 419035

Disclosure Purpose: 24-00189

## Summary of Interests

### Company or Organization

| Entity                                                                                                                                                                    | Type       | Interest Held By |
|---------------------------------------------------------------------------------------------------------------------------------------------------------------------------|------------|------------------|
| Gilead Sciences Inc                                                                                                                                                       | Consultant | Self             |
| <b>Category:</b> Consultant<br><b>Description:</b> One time consultation in 2021<br><b>Additional Information:</b>                                                        |            |                  |
| Pfizer                                                                                                                                                                    | Consultant | Self             |
| <b>Category:</b> Consultant<br><b>Description:</b> Talked to them about Long Covid.<br><b>Additional Information:</b> Non-compensated chats with Pfizer about Long Covid. |            |                  |

## Certification

I certify that the information provided in this disclosure is complete and accurate.

clifford rosen

**Discloser Identifier:** 522824

**Disclosure Purpose:** NEJM

## Summary of Interests

I do not have any interests to disclose at this time.

## Additional Questions

1. **Are there other relationships or activities that readers could perceive to have influenced, or that give the appearance of potentially influencing, what you wrote in the submitted work?**

No.

2. **What is the manuscript title?**

Long Covid and Impaired Cognition: More Evidence and More Work to Do

3. **Are you the corresponding author?**

Yes.

- a. **Please list the other authors' names here.**

Ziyad Al-Aly

## Certification

I certify that the information provided in this disclosure is complete and accurate.
